# Supplementary material for: The Influence of Coal Tar Pitches on Thermal Behaviour of a High-Volatile Bituminous Polish Coal
Source: MDPI journal article supplement (doi:10.3390/ma15249027), 2022-12-17
Supplement: s1 [file s1]

Table S1. The values of calculated weight of blends of coal with CTPs

| Temp.<br>[°C] | Sample weight [%] |       |            |       |       |            |       |        |             |       |
|---------------|-------------------|-------|------------|-------|-------|------------|-------|--------|-------------|-------|
|               | Coal              | CTP86 | Coal+CTP86 |       | CTP94 | Coal+CTP94 |       | CTP103 | Coal+CTP103 |       |
|               |                   |       | ex.        | calc. |       | ex.        | calc. |        | ex.         | calc. |
| <b>100 °C</b> | 98.9              | 99.6  | 99.2       | 98.9  | 99.8  | 99.2       | 98.9  | 99.9   | 99.2        | 98.9  |
| <b>200 °C</b> | 98.6              | 86.3  | 98.7       | 98.4  | 91.0  | 98.8       | 98.5  | 96.2   | 98.9        | 98.6  |
| <b>300 °C</b> | 98.3              | 56.0  | 98.1       | 97.5  | 64.6  | 98.0       | 97.6  | 74.0   | 98.3        | 97.8  |
| <b>350 °C</b> | 97.6              | 45.5  | 97.6       | 96.5  | 53.3  | 97.2       | 96.7  | 59.9   | 97.6        | 96.8  |
| <b>400 °C</b> | 95.5              | 39.3  | 96.5       | 94.4  | 46.7  | 95.3       | 94.5  | 48.7   | 96.1        | 94.6  |
| <b>450 °C</b> | 84.3              | 36.2  | 90.1       | 83.4  | 42.4  | 86.6       | 83.5  | 40.8   | 88.3        | 83.5  |
| <b>500 °C</b> | 76.5              | 35.1  | 84.1       | 75.6  | 40.8  | 77.8       | 75.7  | 36.6   | 82.3        | 75.7  |
| <b>550 °C</b> | 73.7              | 34.4  | 81.2       | 72.9  | 39.6  | 74.7       | 73.0  | 35.8   | 79.5        | 72.9  |
| <b>600 °C</b> | 71.8              | 33.2  | 78.7       | 71.0  | 38.3  | 72.6       | 71.1  | 35.3   | 77.0        | 71.0  |
| <b>650 °C</b> | 70.3              | 30.7  | 76.7       | 69.5  | 36.9  | 71.0       | 69.6  | 34.9   | 74.8        | 69.6  |
| <b>700 °C</b> | 69.2              | 28.1  | 75.0       | 68.3  | 35.4  | 69.8       | 68.5  | 34.5   | 73.0        | 68.5  |
